# Supplementary material for: Electric-field-tunable molecular adsorption on germanane
Source: Royal Society of Chemistry journal article supplement (doi:10.1039/c9cp04122b), 2019-01-01
Supplement: c9cp04122b1.pdf [file c9cp04122b1.pdf]

## Supporting Information

### Electric-field-tunable molecular adsorption on germanane

J. P. Ye, G. Liu\*, Y. Han, B. Z. Sun, X. L. Lei, B. Xu, C. Y. Ouyang

College of Physics and Communication Electronics, Laboratory of Computational Material

Physics, Jiangxi Normal University, Nanchang 330022, China

\*Corresponding author: \*[721lg@jxnu.edu.cn](mailto:721lg@jxnu.edu.cn).

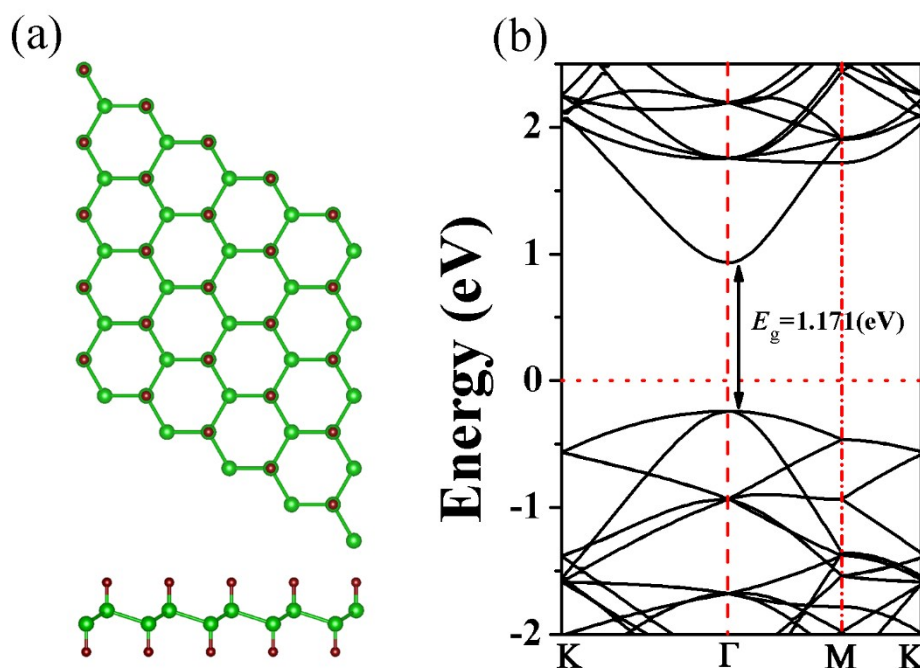

Fig. S1 (a) The top and side views of germanane. The green and brown spheres represent Ge and H atom, respectively. (b) The band structures of germanane. The Fermi level is set to 0 eV.

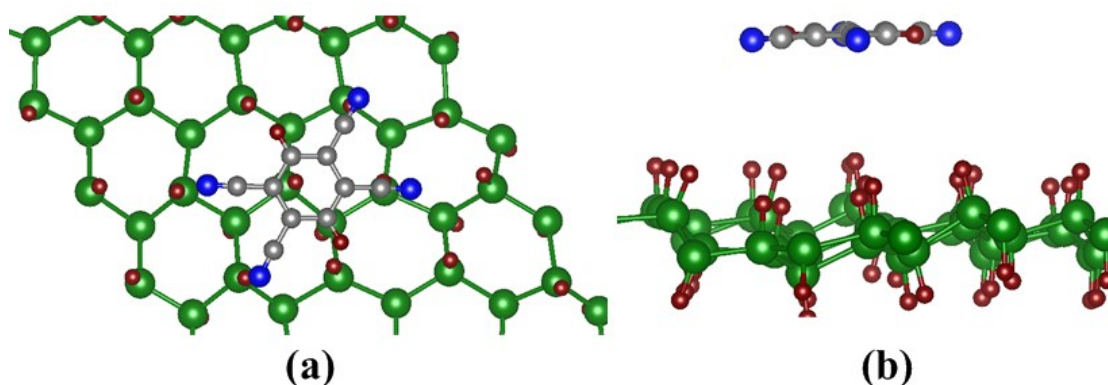

Fig. S2 (a)-(b) The top view and side view of germanane/TCNB under 300k for 10 ps.

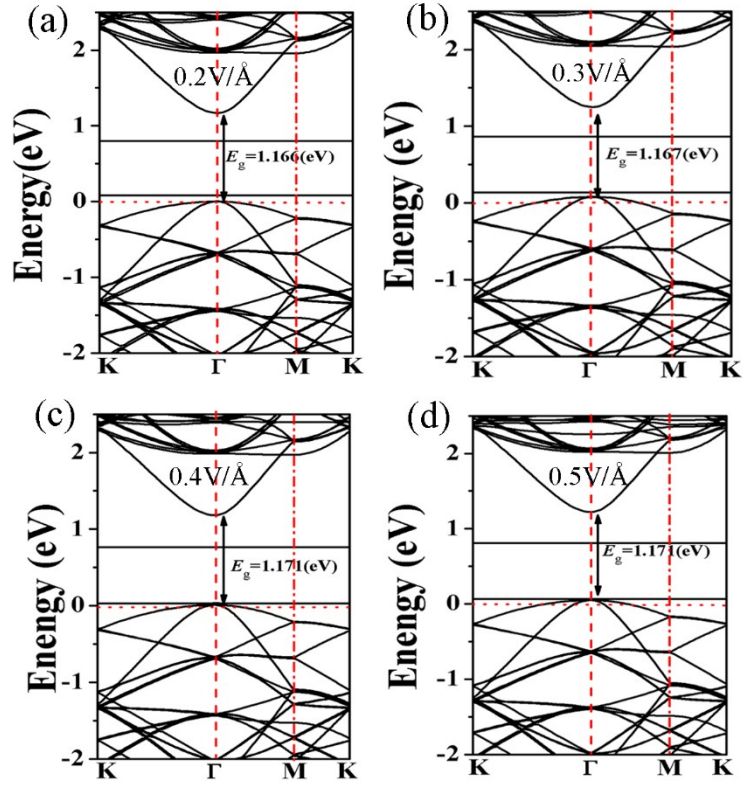

Fig. S3 (a)-(d) The band structures of germanane/TCNB under E-field of 0.2 V/Å, 0.3 V/Å, 0.4 V/Å and 0.5 V/Å, respectively. The Fermi level is set to 0 eV.

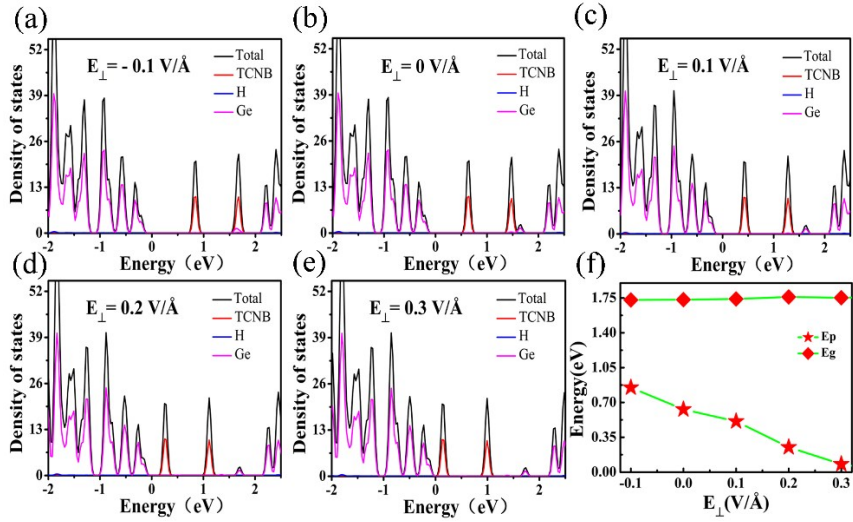

Fig. S4 The projected density of states for germanane/TCNB and the evolution of  $E_p$  under different E-field by using HSE06 method

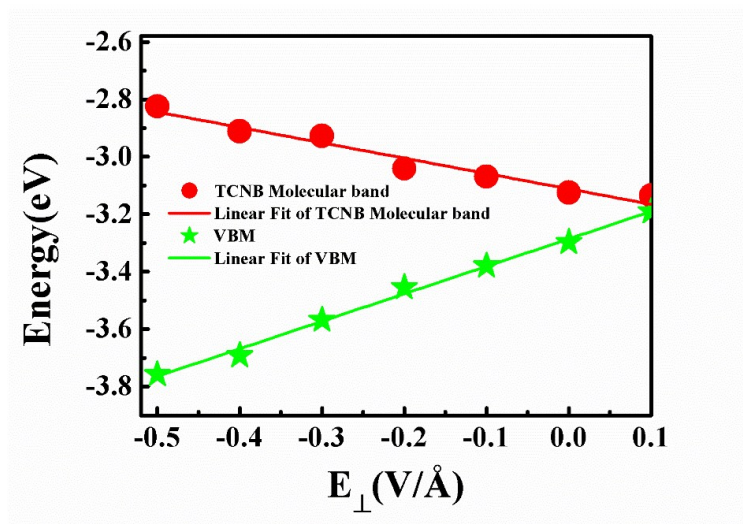

Fig. S5 The energies for VBM at  $\Gamma$ -point and the empty band minimum of TCNB with respect to Fermi level in conduction bands as a function vs E-field ranged from  $-0.5\text{V}/\text{\AA}$  to  $0.1\text{ V}/\text{\AA}$ .
